# Supplementary material for: Erectile dysfunction in men with human immunodeficiency virus: prevalence and associated factors
Source: PubMed Central journal article supplement — Transl Androl Urol. 2024 Nov 27;13(11):2396–407. doi: 10.21037/tau-24-234 (PMC11650357; doi:10.21037/tau-24-234), 2024-11-27
Supplement: tau-13-11-2396-dss.pdf [file tau-13-11-2396-dss.pdf]

## Data Sharing Statement

|                     |                                                                                                                                                     |                                                                                                                                                                                                                |
|---------------------|-----------------------------------------------------------------------------------------------------------------------------------------------------|----------------------------------------------------------------------------------------------------------------------------------------------------------------------------------------------------------------|
| <b>Article Info</b> | <a href="https://dx.doi.org/10.21037/tau-24-234">https://dx.doi.org/10.21037/tau-24-234</a>                                                         |                                                                                                                                                                                                                |
| <b>Item</b>         | <b>Question</b>                                                                                                                                     | <b>Authors' Response<br/>(place "-" if not applicable)</b>                                                                                                                                                     |
| 1                   | Would you like to share data collected for your study to others?                                                                                    | No.                                                                                                                                                                                                            |
| 2                   | If not, would you like to share the reason for your decision?                                                                                       | When we requested permission from our IRB, sharing the data was not granted. Hence, those interested in accessing data can contact the authors to receive instructions on how to proceed with the application. |
| 3                   | What data in particular will be shared?                                                                                                             | -                                                                                                                                                                                                              |
| 4                   | Any other documents will be shared? Such as study protocol, statistical analysis plan, informed consent form, clinical study report, analytic code. | -                                                                                                                                                                                                              |
| 5                   | When will data availability begin?                                                                                                                  | -                                                                                                                                                                                                              |
| 6                   | When will data availability end?                                                                                                                    | -                                                                                                                                                                                                              |
| 7                   | To whom will you share the data?                                                                                                                    | -                                                                                                                                                                                                              |
| 8                   | For what type of analysis or purpose?                                                                                                               | -                                                                                                                                                                                                              |
| 9                   | How or where can the data/documents be obtained?                                                                                                    | -                                                                                                                                                                                                              |
| 10                  | Any other restrictions?                                                                                                                             | -                                                                                                                                                                                                              |
